# Supplementary material for: High carnivore population density highlights the conservation value of industrialised sites
Source: PubMed Central journal article supplement (PMC6224568; doi:10.1038/s41598-018-34936-0), 2018-11-08
Supplement: 41598_2018_34936_MOESM1_ESM.pdf [file 41598_2018_34936_MOESM1_ESM.pdf]

1 **Supplementary information**

2

3 High carnivore population density highlights the conservation value of industrialised sites

4

5 Daan J. E. Loock<sup>a\*</sup>, Samuel T. Williams<sup>b,c,d\*</sup>, Kevin W. Emslie<sup>b</sup>, Wayne S. Matthews<sup>e</sup>, Lourens

6 H. Swanepoel<sup>b</sup>

7

8 <sup>a</sup> Centre for Sustainable Agriculture, Faculty of Natural and Agricultural Sciences,

9 University of the Free State, 205 Nelson Mandela Drive, Park West, Bloemfontein, 930,

10 South Africa

11 <sup>b</sup>Department of Zoology, School of Mathematical & Natural Sciences, University of Venda,

12 Private Bag X5050, Thohoyandou, 0950, South Africa

13 <sup>c</sup>Department of Anthropology, Durham University, Durham, DH1 3LE, United Kingdom

14 <sup>d</sup>Institute for Globally Distributed Open Research and Education (IGDORE)

15 <sup>e</sup>Department of Environmental Sciences, College of Agriculture & Environmental Sciences,

16 University of South Africa, P.O. Box 392, Pretoria, 0003, South Africa

17 \*These authors contributed equally to this work, and are listed in alphabetical order

18 Contact details:

19 Daan J.E. Loock: daanje.l@mweb.co.za

20 Samuel T. Williams: samual.t.williams@gmail.com

21 Kevin W. Emslie: kevin.emslie@gmail.com

22 Wayne S. Matthews: wayne@wra-africa.net

23 Lourens H. Swanepoel: lourens.swanepoel.univen@gmail.com

24

25 Fig. S1. Cumulative frequency curve showing the relationship between the cumulative  
26 number of individual serval identified on the camera traps at Secunda in South Africa.

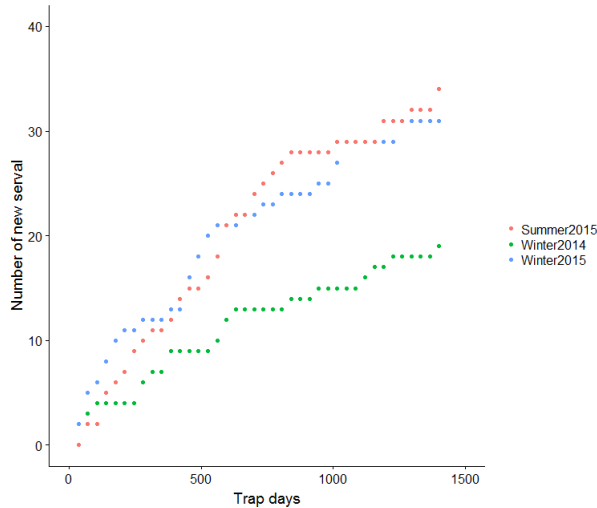

27

28

29 Table S2. Modelling results showing: a) (Mhab.sec) the effect of habitat type on detection  
30 probability (g0); b) (Mdens.habitat) the effect of session on density and habitat on  
31 detection probability; c) as model b, but allows the scale parameter (sigma) to vary with  
32 session; d) (Mb.sec) the effect of behavioural response on detection probability; e)  
33 (Mseason) the effect of density affected by season and year; and f) (m0.sec) the null model.

|          | model      | detectf | npar | logLik  | AIC   | AICc  | dAICc | AICcw |
|----------|------------|---------|------|---------|-------|-------|-------|-------|
|          |            | n       |      |         |       |       |       | t     |
| Mhab.sec | D~1        | hazard  | 7    | -       | 2044. | 2046. | 0.00  | 0.47  |
|          | g0~Habitat | rate    |      | 1015.42 | 85    | 33    |       |       |
|          |            |         |      | 6872    |       |       |       |       |

---

|                   |            |        |    |         |       |       |       |      |
|-------------------|------------|--------|----|---------|-------|-------|-------|------|
|                   | sigma~1    |        |    |         |       |       |       |      |
|                   | z~1        |        |    |         |       |       |       |      |
| Mdens.habitat     | D~session  | hazard | 9  | -       | 2043. | 2046. | 0.10  | 0.45 |
|                   | g0~Habitat | rate   |    | 1012.99 | 99    | 43    |       |      |
|                   | sigma~1    |        |    | 6398    |       |       |       |      |
|                   | z~1        |        |    |         |       |       |       |      |
| Mdens.habitat.ses | D~session  | hazard | 11 | -       | 2046. | 2049. | 3.59  | 0.08 |
|                   | g0~Habitat | rate   |    | 1012.12 | 25    | 92    |       |      |
|                   | sigma~ses  |        |    | 4715    |       |       |       |      |
|                   | sion z~1   |        |    |         |       |       |       |      |
| Mb.sec            | D~1 g0~b   | hazard | 5  | -       | 2067. | 2067. | 21.47 | 0.00 |
|                   | sigma~1    | rate   |    | 1028.51 | 03    | 80    |       |      |
|                   | z~1        |        |    | 4939    |       |       |       |      |
| Mseason           | D~session  | hazard | 6  | -       | 2072. | 2073. | 26.94 | 0.00 |
|                   | g0~1       | rate   |    | 1030.08 | 18    | 27    |       |      |
|                   | sigma~1    |        |    | 9274    |       |       |       |      |
|                   | z~1        |        |    |         |       |       |       |      |
| M0.sec            | D~1 g0~1   | hazard | 4  | -       | 2075. | 2075. | 29.37 | 0.00 |
|                   | sigma~1    | rate   |    | 1033.59 | 19    | 69    |       |      |
|                   | z~1        |        |    | 2632    |       |       |       |      |

---
